# Supplementary material for: A novel fluorescent chemosensor enables dual-channel selective “turn-on” detection of Hg2+ and Ag+via distinct thiophilic effects, essential mechanisms, and excellent sensing performance for mercury(ii) in aggregated states
Source: Royal Society of Chemistry journal article supplement (doi:10.1039/d4tc00785a), 2024-01-01
Supplement: d4tc00785a1.pdf [file d4tc00785a1.pdf]

*Electronic Supplementary Information (ESI)*

**A novel fluorescent chemosensor enables dual-channel selective “turn-on” detection of  $\text{Hg}^{2+}$  and  $\text{Ag}^+$  via distinct thiophilic effects, essential mechanisms, and excellent sensing performance for mercury(II) in aggregated states**

Zhijun Ruan\*, Xinyi Dong, Tao Long\*, Shanshan Liu, Yanmei Chen, Junqi Lin\*

Hubei Key Laboratory of Processing and Application of Catalytic Materials, College of Chemistry and Chemical Engineering, Huanggang Normal University, Huanggang 438000, China

## Experimental section

### 1. Material

Dichloromethane (DCM) and tetrahydrofuran (THF) was dried over and distilled from  $\text{CaH}_2$ . Triphenylamine (TPA), terephthaloyl dichloride, 1, 2-ethanedithiol, aluminum chloride ( $\text{AlCl}_3$ ) and all the other reagents were purchased from commercial suppliers and directly used without further purification. Various inorganic salt:  $\text{Hg}(\text{ClO}_4)_2 \cdot 3\text{H}_2\text{O}$ ,  $\text{AgNO}_3$ ,  $\text{LiNO}_3$ ,  $\text{NaNO}_3$ ,  $\text{KNO}_3$ ,  $\text{Co}(\text{NO}_3)_2 \cdot 6\text{H}_2\text{O}$ ,  $\text{Cu}(\text{NO}_3)_2 \cdot 3\text{H}_2\text{O}$ ,  $\text{Pb}(\text{NO}_3)_2$ ,  $\text{Cd}(\text{NO}_3)_2 \cdot 4\text{H}_2\text{O}$ ,  $\text{Ba}(\text{NO}_3)_2$ ,  $\text{Ca}(\text{NO}_3)_2 \cdot 4\text{H}_2\text{O}$ ,  $\text{Mg}(\text{ClO}_4)_2$ ,  $\text{Fe}(\text{ClO}_4)_2$ ,  $\text{Zn}(\text{NO}_3)_2 \cdot 6\text{H}_2\text{O}$ ,  $\text{Mn}(\text{NO}_3)_2 \cdot 4\text{H}_2\text{O}$ ,  $\text{Ni}(\text{NO}_3)_2 \cdot 6\text{H}_2\text{O}$ ,  $\text{Al}(\text{NO}_3)_3 \cdot 9\text{H}_2\text{O}$ ,  $\text{Fe}(\text{NO}_3)_3 \cdot 9\text{H}_2\text{O}$  and  $\text{Cr}(\text{NO}_3)_3 \cdot 9\text{H}_2\text{O}$  was dissolved in ultra-pure water to afford  $1 \times 10^{-1}$  mol/L aqueous solution, respectively.

### 2. Instrumentation

$^1\text{H}$  and  $^{13}\text{C}$  NMR spectroscopy were recorded in  $\text{CDCl}_3$  or  $\text{THF-}d_8$  with a Varian Mercury 300 or Bruker ARX400 spectrometer using  $\text{Me}_4\text{Si}$  (TMS;  $\delta = 0$  ppm) as internal standard. Fourier transform infrared (FTIR) spectra were recorded on a Nicolet NEXUS-6700 FTIR spectrophotometer in the region of  $400\text{--}4000\text{ cm}^{-1}$ . EI-MS spectrum was performed with a Finnigan PRACE mass spectrometer. Elemental analysis (EA) was conducted by a CARLOERBA-1106 micro-elemental analyzer. UV-Vis spectra were collected by using a Shimadzu UV-2600 spectrometer. Photoluminescence spectra were conducted on a Hitachi F-4700 spectrophotometer. The quantum yield was gained by a reference method with 9,10-Diphenylanthracene ( $\lambda_{\text{ex}} = 366\text{ nm}$ ,  $\Phi_{\text{F}} = 0.95$ ) as the standard compound. Density functional theory (DFT) calculations were carried out based on the B3LYP/6-31G(d) basis set. Single crystals of **DTPAO** (CCDC 1876442) and **DTPAS** (CCDC 2267083) were obtained from DCM/n-hexane mixture and were then tested by X-ray crystallography.

The crystal analysis was performed over a Bruker SMART APEX II CCD diffractometer with graphite-monochromatized MoK $\alpha$  radiation ( $\lambda = 0.71073 \text{ \AA}$ ).

### 3. Fluorescence emission changes with different metal ions

To optimize the sensing performance of the probe, the effect of probe concentration of 10, 20 and 100  $\mu\text{M}$  was investigated. Taking the detection of  $\text{Ag}^+$  as an example, the employ of 20  $\mu\text{M}$  **DTPAS** gave the highest linearity ( $R^2 = 0.996$ ), the maximum linear ranges (0 to 50  $\mu\text{M}$ ) and the best fluorescence enhancement efficiency (41.2-fold) compared to the other two concentrations. Therefore, 20  $\mu\text{M}$  was selected as the optimal concentration of probe.

Testing in pure solution: a solution of **DTPAS** ( $2 \times 10^{-5} \text{ mol/L}$ ) in THF was prepared, then various metal ions ( $1 \times 10^{-1} \text{ M}$ , 18  $\mu\text{L}$ ) were added to the solution of **DTPAS** respectively. The resultant solutions (3 mL) were placed in a quartz cell (10.0 mm width) at room temperature, and the changes of the PL intensity were recorded each time (excitation wavelength 380 nm). Testing in aggregated state: different metal ions ( $1 \times 10^{-1} \text{ M}$ , 18  $\mu\text{L}$ ) were added to the solution of 60  $\mu\text{L}$  **DTPAS** ( $1 \times 10^{-3} \text{ M}$  in THF) respectively, then distilled water was added to generate aggregated nanoparticles (with  $f_w = 98\%$ ). The changes of the PL spectra were recorded each time at room temperature (excitation wavelength 380 nm).

### 4. UV-Vis absorption spectra changes with different metal ions

Solution of **DTPAS** ( $2 \times 10^{-5} \text{ mol/L}$ ) in THF was prepared, then various metal ions ( $1 \times 10^{-1} \text{ M}$ , 18  $\mu\text{L}$ ) were added to the solution of **DTPAS** respectively. The resultant solutions (3 mL) were placed in a quartz cell (10.0 mm width) at room temperature, and the changes of the UV-Vis absorption spectra were recorded each time.

### 5. Synthesis and characterization

### 5.1 Synthesis of 1,4-phenylenebis((4-(diphenylamino)phenyl)methanone) (**DTPAO**)

Triphenylamine (2.45 g, 10 mmol) and fully ground powder of anhydrous aluminum chloride ( $\text{AlCl}_3$ ) (1.33 g, 10 mmol) were dissolved in 40 mL dry DCM, then terephthaloyl dichloride (1.02 g, 5 mmol) was added to the resultant suspension under stirring. After stirring for 24 h at 60 °C, the reaction mixture was washed with saturated brine and extracted three times with DCM (3 × 60 mL), and dried over anhydrous  $\text{Na}_2\text{SO}_4$ . Then the organic solvent was evaporated under vacuum, and the residue was purified by column chromatography over silica gel using  $\text{CH}_2\text{Cl}_2$ –petroleum ether (6:1, v/v) mixture as eluent to afford a light yellow solid (1.92 g, 62%, m.p. 139–141 °C). FTIR (thin film),  $\nu$  ( $\text{cm}^{-1}$ ): 3036, 2923, 1649, 1584, 1554, 1489, 1311, 1274, 1153, 926, 865, 751, 695.  $^1\text{H}$  NMR (300 MHz,  $\text{CDCl}_3$ ): 7.82 (s, 4H, ArH), 7.73 (d,  $J$  = 9.0, 4H, ArH), 7.36 (m, 8H, ArH), 7.20 (m, 12H, ArH), 7.02 (d,  $J$  = 6.0, 4H, ArH).  $^{13}\text{C}$  NMR (75 MHz,  $\text{CDCl}_3$ ): 194.5, 152.3, 146.3, 141.1, 132.1, 129.7, 129.3, 128.9, 126.2, 124.9, 119.3. MS (EI): calcd for 620.2; found: 620.5. Anal. calcd for  $\text{C}_{44}\text{H}_{32}\text{N}_2\text{O}_2$ : C 85.14, H 5.20, N 4.51; found: C 84.89, H 5.02, N 4.48.

### 5.2 Synthesis of (4-(diphenylamino)phenyl)(4-(2-(4-(diphenylamino)phenyl)-1,3-dithiolan-2-yl)phenyl)methanone (**DTPAOS**)

Compound **DTPAO** (0.62 g, 1 mmol) and 1, 2-ethanedithiol (0.17 mL, 2 mmol) were dissolved in 15 mL dry DCM, then  $\text{BF}_3 \cdot \text{Et}_2\text{O}$  (0.50 mL, 4 mmol) as the Lewis acid was added. After stirring overnight at room temperature, aqueous  $\text{NaHCO}_3$  was added to the reaction mixture to adjust the pH value of 8–9. The resultant solution was extracted with DCM for three times (3 × 40 mL) and dried over anhydrous  $\text{Na}_2\text{SO}_4$ . Then the organic solvent was evaporated under vacuum, and the residue was purified by column chromatography over silica gel using  $\text{CH}_2\text{Cl}_2$ –petroleum ether (2:1, v/v) mixture as eluent to afford a light yellow solid (0.49 g, 70%, m.p. 119–121 °C). FTIR (thin film),  $\nu$

( $\text{cm}^{-1}$ ): 2955, 2924, 2853, 1646, 1583, 1488, 1310, 1273, 1176, 930, 753, 695.  $^1\text{H}$  NMR (300 MHz,  $\text{CDCl}_3$ ): 7.76 (m, 6H, ArH), 7.40 (m, 6H, ArH), 7.25 (m, 14H, ArH), 7.08 (m, 6H, ArH), 3.53 (m, 4H,  $-\text{SCH}_2-$ ).  $^{13}\text{C}$  NMR (75 MHz,  $\text{CDCl}_3$ ): 194.7, 152.0, 148.9, 147.4, 147.0, 146.5, 136.8, 132.0, 129.7, 129.4, 129.3, 129.0, 128.1, 126.0, 124.7, 123.2, 122.2, 119.3, 76.4, 40.3. MS (EI): calcd for 696.2; found: 695.8. Anal. calcd for  $\text{C}_{46}\text{H}_{36}\text{N}_2\text{OS}_2$ : C 79.28, H 5.21, N 4.02; found: C 78.95, H 5.39, N 4.11.

### 5.3 Synthesis of 4,4'-(2,2'-(1,4-phenylene)bis(1,3-dithiolane-2,2-diyl))bis(*N,N*-diphenylaniline) (DTPAS)

**DTPAS** was prepared via the same procedure to that of **DTPAOS** with adjusted feed ratio, 1 mmol **DTPAO**, 4 mmol 1, 2-ethanedithiol and 8 mmol  $\text{BF}_3 \cdot \text{Et}_2\text{O}$ . The crude product was purified by column chromatography over silica gel using  $\text{CH}_2\text{Cl}_2$ –petroleum ether (1:1, v/v) mixture as eluent to afford a pale solid (0.35 g, 36%, m.p. 243–245  $^\circ\text{C}$ ). FTIR (thin film),  $\nu$  ( $\text{cm}^{-1}$ ): 3032, 2922, 2850, 1589, 1493, 1313, 1274, 1179, 1018, 753, 695.  $^1\text{H}$  NMR (300 MHz,  $\text{THF}-d_8$ ): 7.54 (s, 4H, ArH), 7.44 (d,  $J = 9.0$ , 4H, ArH), 7.22 (t,  $J = 6.0$ , 8H, ArH), 7.06 (d,  $J = 6.0$ , 8H, ArH), 7.00 (t,  $J = 6.0$ , 4H, ArH), 6.91 (d,  $J = 6.0$ , 4H, ArH), 7.02 (d,  $J = 6.0$ , 4H, ArH), 3.58 (m, 8H,  $-\text{SCH}_2-$ ).  $^{13}\text{C}$  NMR (75 MHz,  $\text{THF}-d_8$ ): 147.7, 146.8, 143.7, 137.8, 129.3, 129.1, 127.8, 124.4, 122.9, 121.9, 76.4, 39.9. MS (EI): calcd for 772.2; found: 772.6. Anal. calcd for  $\text{C}_{48}\text{H}_{40}\text{N}_2\text{S}_4$ : C 74.57, H 5.22, N 3.62; found: C 74.28, H 5.33, N 3.47.

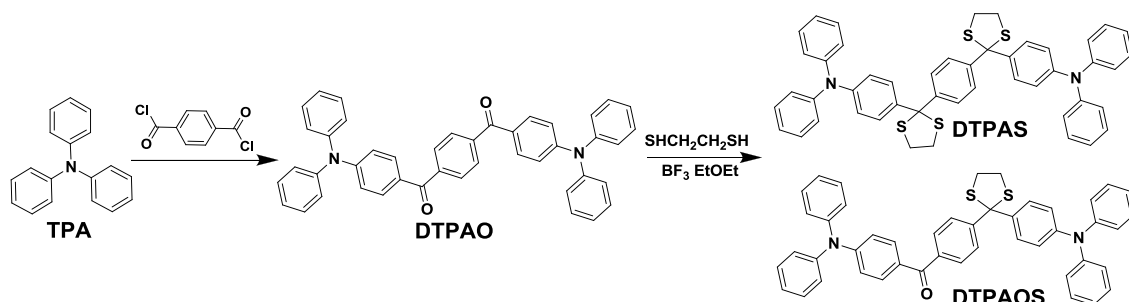

**Scheme S1.** Synthetic pathway of **DTPAS** and **DTPAOS**.

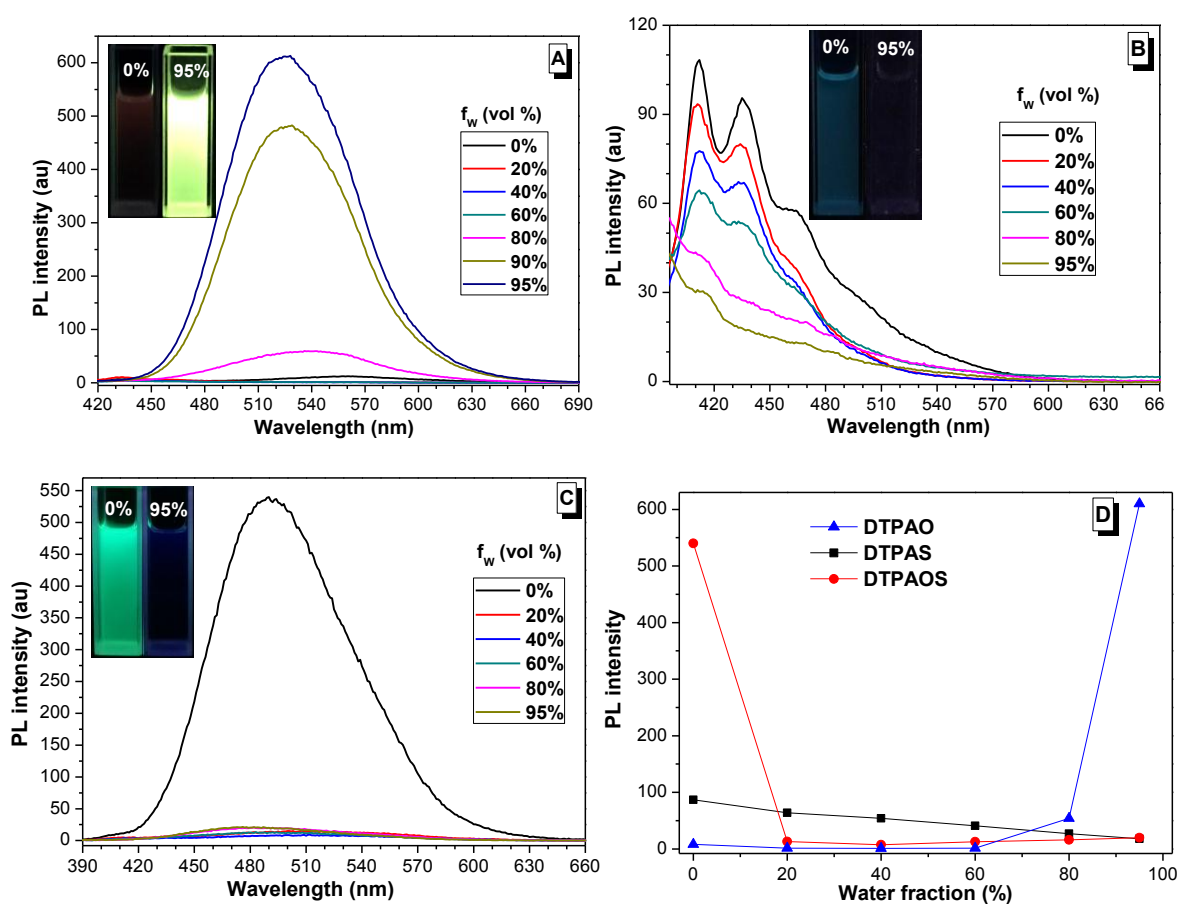

**Fig. S1** PL spectra of **DTPAO** (a), **DTPAS** (b) and **DTPAOS** (c) in THF/H<sub>2</sub>O mixtures (20  $\mu$ M) with different water fractions. Inset: Photos of luminogens in THF/H<sub>2</sub>O mixtures taken under the illumination of a 365 nm UV lamp. (d) Changes of PL peak intensity with water fractions.

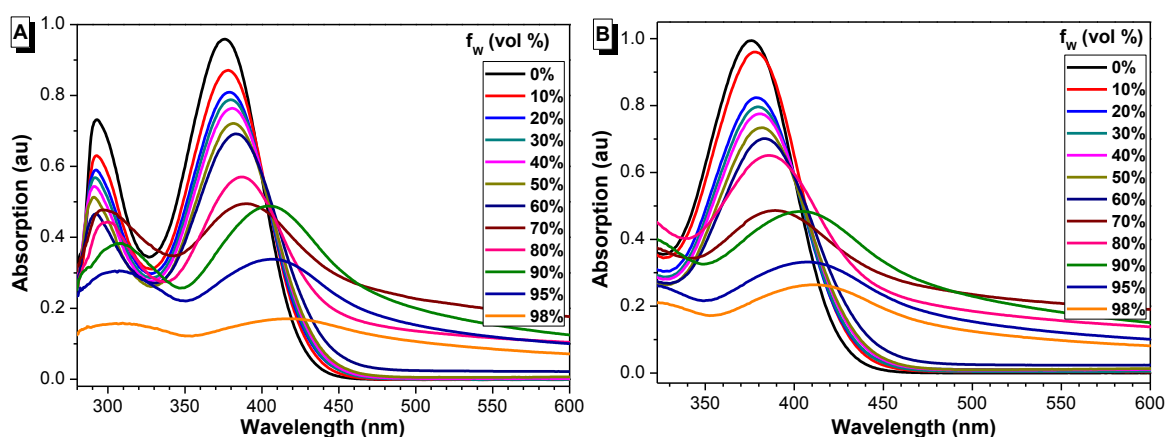

**Fig. S2** UV-Vis spectra of **DTPAO** (a) and **DTPAS+Hg<sup>2+</sup>** (b) in THF/H<sub>2</sub>O mixtures with different water fractions.

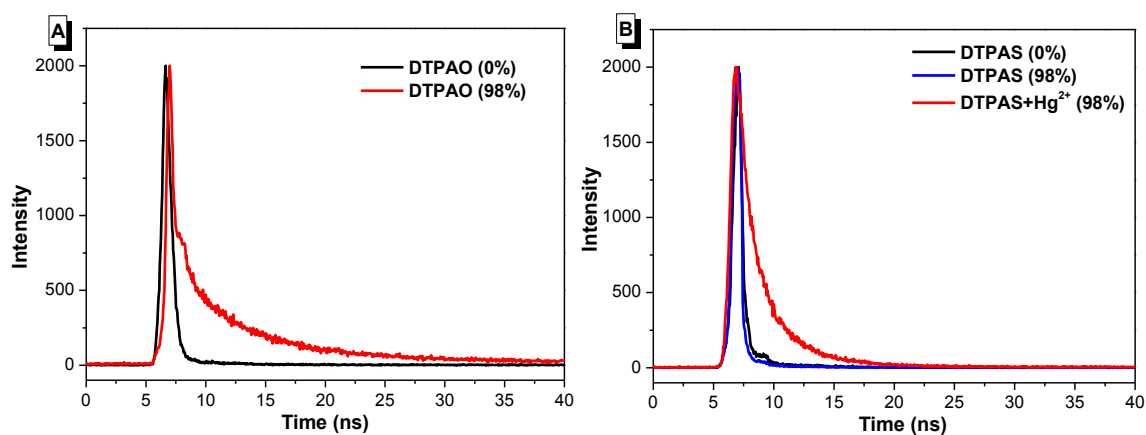

**Fig. S3** Time-resolved photoluminescence spectra of **DTPAO** (a), **DTPAS** and **DTPAS+Hg<sup>2+</sup>** (b) with water fractions as 0% and 98%.

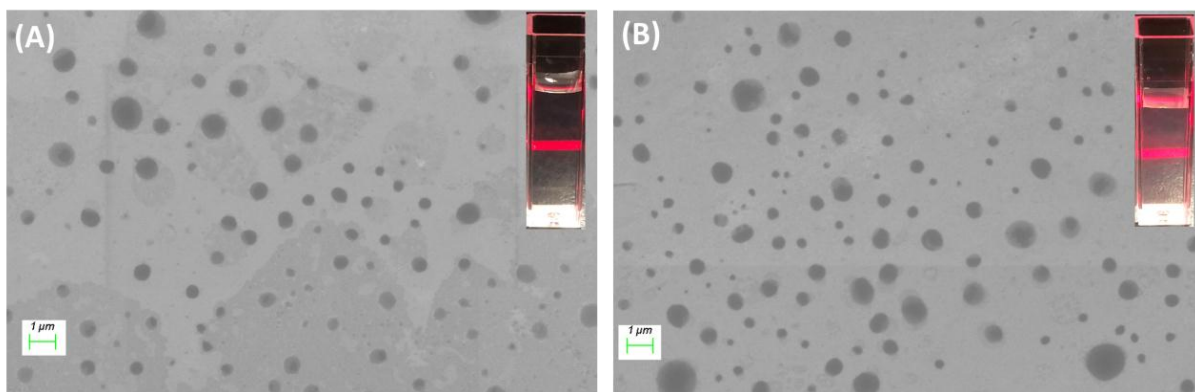

**Fig. S4** Scanning electron microscopy and image of the Tyndall effect of **DTPAO** (a), **DTPAS+Hg<sup>2+</sup>** (b) with water fractions as 98%.

**Table S1** Photophysical data of **DTPAO**, **DTPAOS** and **DTPAS**.

| Sample        | $\lambda_{\text{max}}$ ,<br>(nm) <sup>a</sup> | PL $\lambda_{\text{em}}$<br>(nm)    | $\Phi_{\text{F}}$ (%) <sup>a</sup> | $\Phi_{\text{F}}$ (%) <sup>b</sup> | $\Phi_{\text{F}}$ (%) <sup>c</sup> | Lifetime<br>(ns) <sup>a</sup> | Lifetime<br>(ns) <sup>b</sup> |
|---------------|-----------------------------------------------|-------------------------------------|------------------------------------|------------------------------------|------------------------------------|-------------------------------|-------------------------------|
| <b>DTPAO</b>  | 292, 376                                      | 562 <sup>a</sup> , 525 <sup>b</sup> | 3.6                                | 36.4                               | 38.2                               | 5.4                           | 10.5                          |
| <b>DTPAOS</b> | 296, 364                                      | 491 <sup>a</sup>                    | 45.2                               | 0.6                                | 1.3                                | 12.6                          | 3.9                           |
| <b>DTPAS</b>  | 307                                           | 412, 435 <sup>a</sup>               | 0.9                                | 0.2                                | 0.3                                | 4.3                           | 2.2                           |

<sup>a</sup> Photophysical data determined in THF (20  $\mu\text{M}$ ); <sup>b</sup> determined in THF-water mixtures ( $f_{\text{w}}$  = 98%, 20  $\mu\text{M}$ ); <sup>c</sup> determined in solid state.

**Table S2** Summary of crystal data and intensity collection parameters for **DTPAO** and **DTPAS**.

| Compound                              | <b>DTPAO</b>                              | <b>DTPAS</b>              |
|---------------------------------------|-------------------------------------------|---------------------------|
| Formula                               | $C_{44}H_{32}N_2O_2 \cdot 1/2(C_6H_{14})$ | $C_{48}H_{40}N_2S_4$      |
| Formula mass                          | 663.80                                    | 773.06                    |
| Wavelength/Å                          | 0.71073                                   | 1.54178                   |
| Temperature/K                         | 273(2)                                    | 296(2)                    |
| Space group                           | Triclinic, P-1                            | Monoclinic, C2/c          |
| a/Å                                   | 10.429(4)                                 | 45.1405(16)               |
| b/Å                                   | 11.065(4)                                 | 7.6554(3)                 |
| c/Å                                   | 15.589(5)                                 | 11.8691(5)                |
| $\alpha/^\circ$                       | 93.724(6)                                 | 90.00                     |
| $\beta/^\circ$                        | 102.674(6)                                | 104.164(4)                |
| $\gamma/^\circ$                       | 90.425(6)                                 | 90.00                     |
| V / Å <sup>3</sup>                    | 1750.9(10)                                | 3976.9(3)                 |
| Z/mg.m <sup>-3</sup>                  | 2, 1.259                                  | 4, 1.291                  |
| F000                                  | 702                                       | 1624                      |
| Theta range/°                         | 1.342 to 24.820                           | 2.019 to 68.336           |
| No. of collected reflns               | 12103                                     | 12926                     |
| No. of unique reflns.                 | 5932                                      | 3469                      |
| Rint                                  | 0.0439                                    | 0.0594                    |
| Data/restraints/parameters            | 5932/0/461                                | 3469/0/244                |
| R1,wR2[obs I>2σ(I)]                   | R1 = 0.0633, wR2 = 0.1832                 | R1 = 0.0438, wR2 = 0.1137 |
| R1,wR2 (all data)                     | R1 = 0.0962, wR2 = 0.2235                 | R1 = 0.0645, wR2 = 0.1253 |
| Residual peak/hole e. Å <sup>-3</sup> | 0.866 and -0.277                          | 0.164 and -0.229          |
| CCDC number                           | 1876442                                   | 2267083                   |

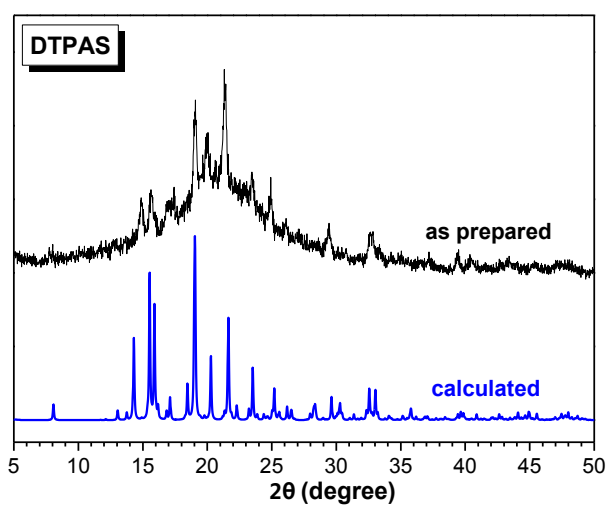**Fig. S5** XRD of the as-prepared solid of **DTPAS** and its calculated PXRD pattern.



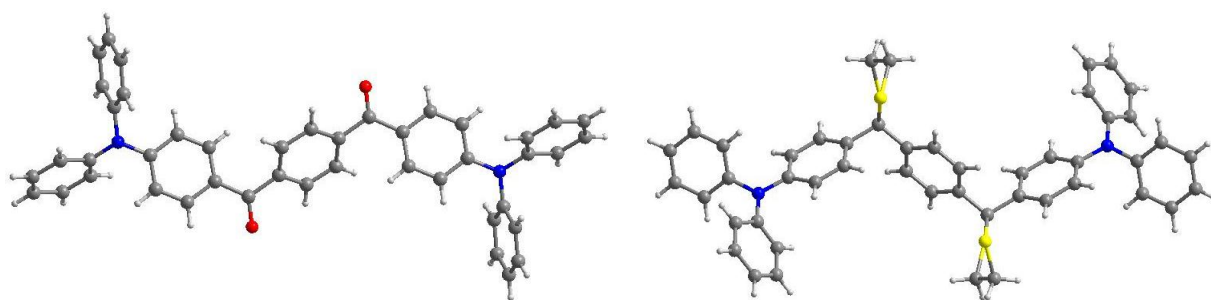

**Fig. S6** Molecular structures of **DTPAO** and **DTPAS** in the single crystal.

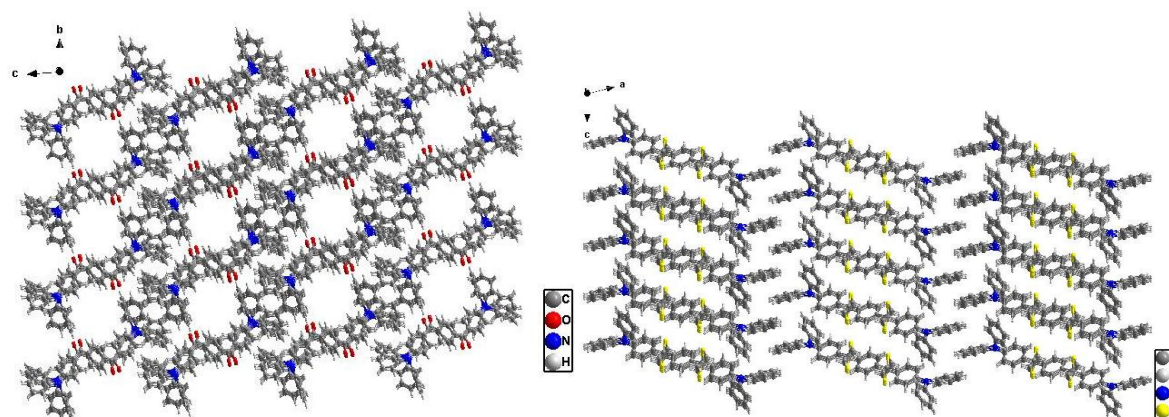

**Fig. S7** Molecular packing mode of **DTPAO** and **DTPAS** crystals.

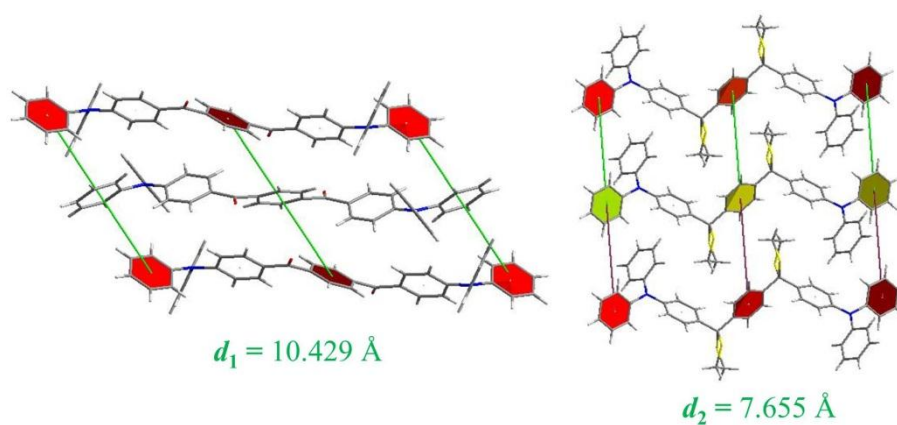

**Fig. S8** The  $\pi$ - $\pi$  distances for **DTPAO** (left) and **DTPAS** (right).

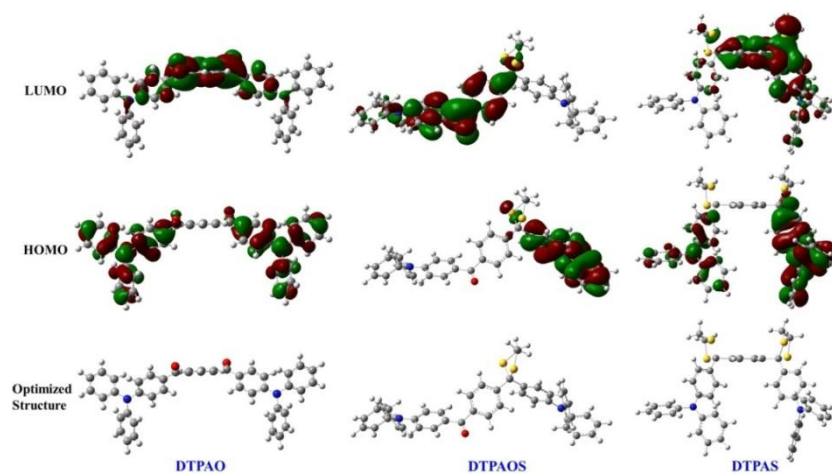

**Fig. S9** Calculated molecular orbital amplitude plots of HOMO and LUMO levels and optimized molecular structures of **DTPAO**, **DTPAOS** and **DTPAS**.

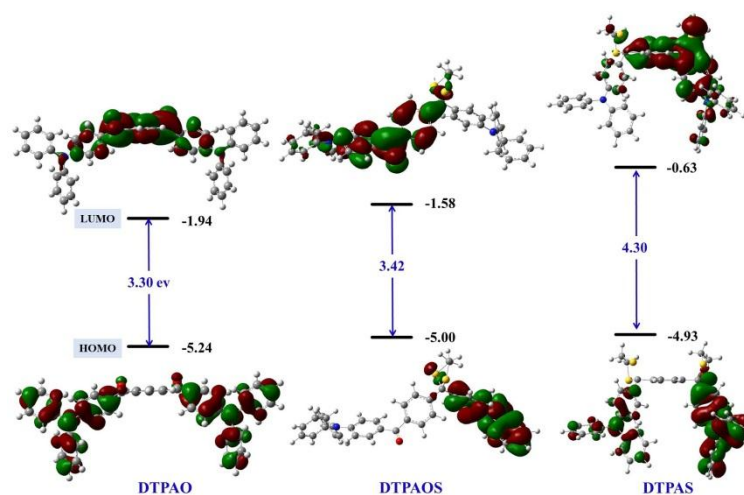

**Fig. S10** HOMO, LUMO and corresponding energy gaps of **DTPAO**, **DTPAOS** and **DTPAS** based on optimized molecular structures.

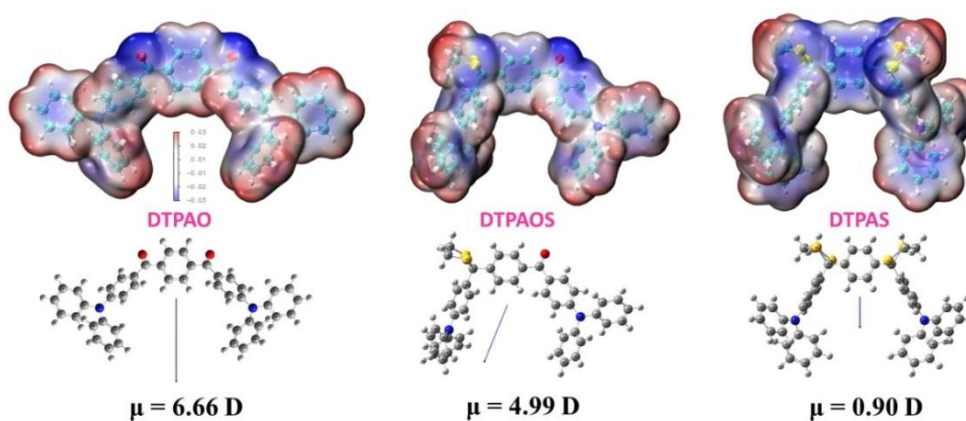

**Fig. S11** ESP maps and the dipole moment of **DTPAO**, **DTPAOS** and **DTPAS**.

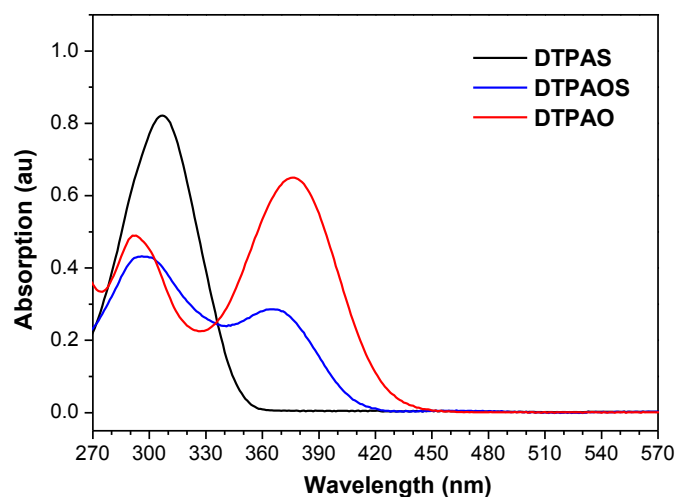

**Fig. S12** UV-Vis spectra of **DTPAO**, **DTPAOS** and **DTPAS** in THF.

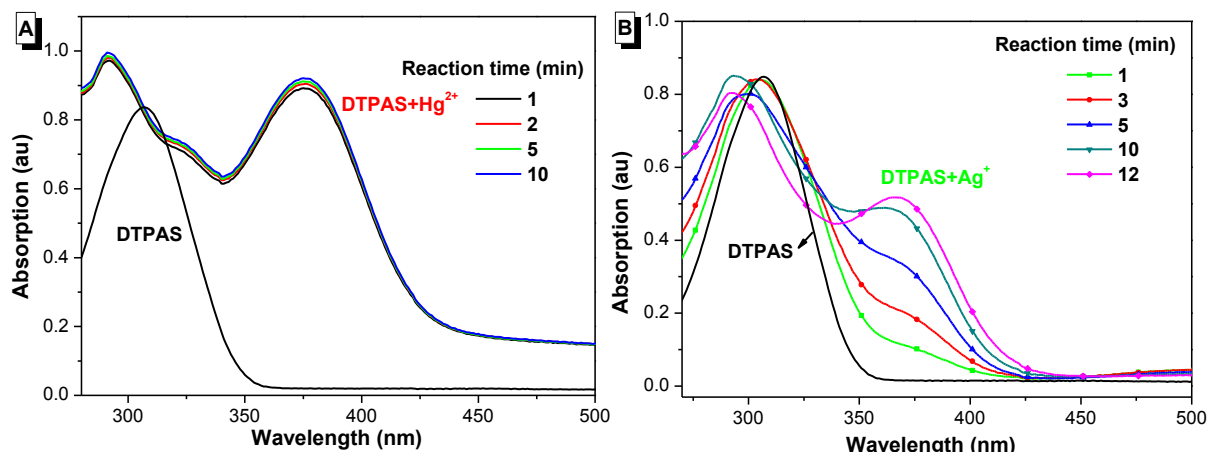

**Fig. S13** UV-Vis absorption spectra of **DTPAS** in presence of  $\text{Hg}^{2+}$  (a) and  $\text{Ag}^{+}$  (b) under different reaction time in THF.

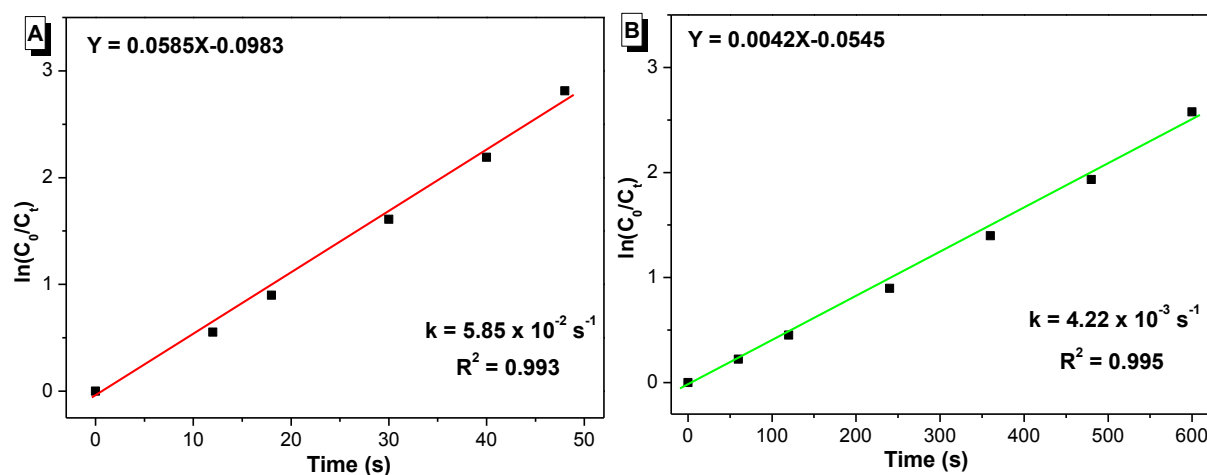

**Fig. S14** Pseudo-first-order kinetics plots for **DTPAS** reacted with  $\text{Hg}^{2+}$  (a) and  $\text{Ag}^{+}$  (b), respectively.  $C_0$  is the  $[\text{DTPAS}]_0$  at time  $t = 0$  and  $C_t$  is the  $[\text{DTPAS}]_t$  at time  $t$ . The rate constant ( $k$ ) is calculated as  $\ln C_0/C_t = kt$ .

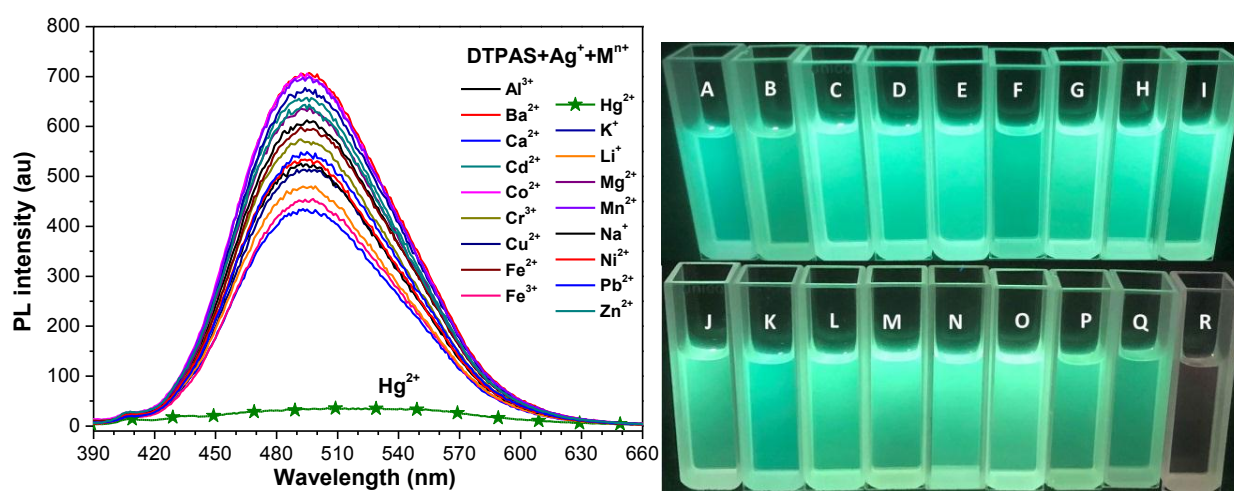

**Fig. S15** PL spectra and fluorescence photos of **DTPAS** (20  $\mu\text{M}$ ) reacted with  $\text{Ag}^+$  in the presence of various metal ions ( $6 \times 10^{-4}$  M) in THF solution. (A-R) **DTPAS**+ $\text{Ag}^+$ +  $\text{Al}^{3+}$ ,  $\text{Fe}^{3+}$ ,  $\text{Cu}^{2+}$ ,  $\text{Pb}^{2+}$ ,  $\text{Co}^{2+}$ ,  $\text{Cr}^{3+}$ ,  $\text{Cd}^{2+}$ ,  $\text{Mg}^{2+}$ ,  $\text{Mn}^{2+}$ ,  $\text{Ba}^{2+}$ ,  $\text{Fe}^{2+}$ ,  $\text{Ca}^{2+}$ ,  $\text{Ni}^{2+}$ ,  $\text{Zn}^{2+}$ ,  $\text{Li}^+$ ,  $\text{K}^+$ ,  $\text{Na}^+$ ,  $\text{Hg}^{2+}$ .

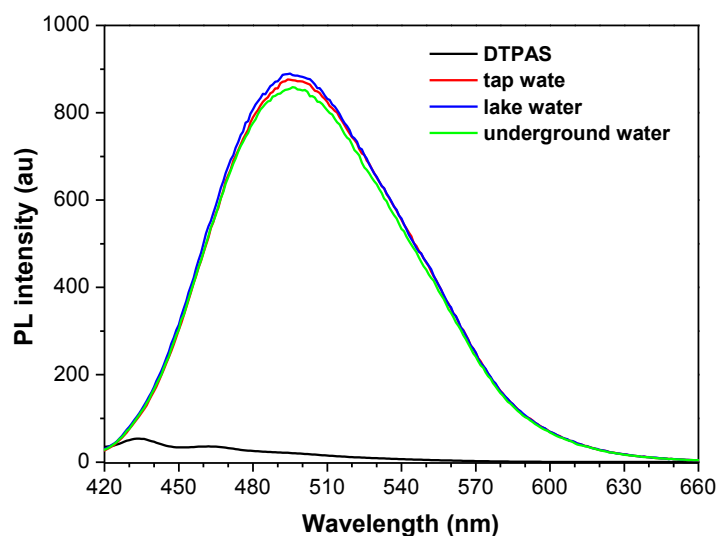

**Fig. S16** PL spectra of **DTPAS** (10  $\mu\text{M}$ ) in THF, and **DTPAS** reacted with  $\text{Ag}^+$  ( $3 \times 10^{-4}$  M) in tap water, lake water and underground water.

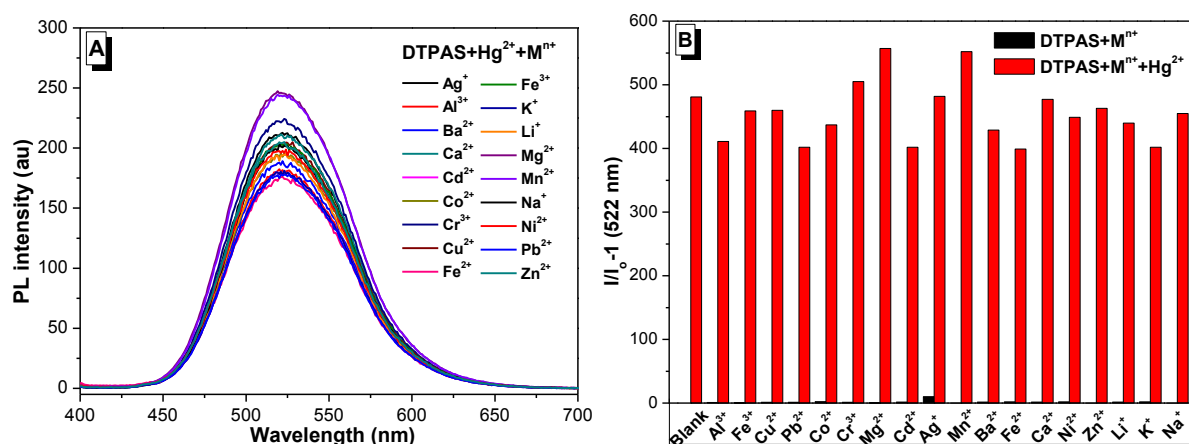

**Fig. S17** (a) PL spectra of **DTPAS** (20  $\mu\text{M}$ ) in the presence of  $\text{Hg}^{2+}$  and various metal ions ( $6 \times 10^{-4}$  M) in THF- $\text{H}_2\text{O}$  mixtures with  $f_W = 98\%$ . (b) Fluorescence spectra profiles of **DTPAS** (20  $\mu\text{M}$ ) in the presence of various metal ions and  $\text{Hg}^{2+}$  ( $6 \times 10^{-4}$  M, red line) in THF- $\text{H}_2\text{O}$  mixtures with  $f_W = 98\%$ .

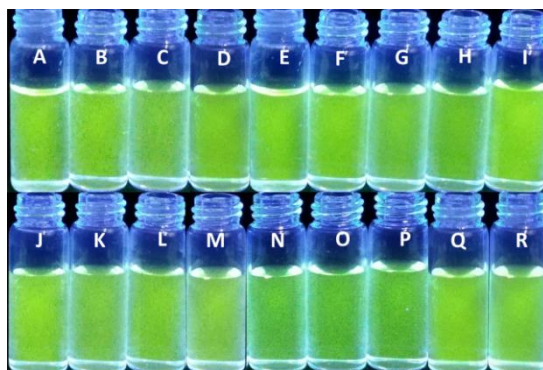

**Fig. S18** Fluorescence photos of **DTPAS** (20  $\mu\text{M}$ ) reacted with  $\text{Hg}^{2+}$  in the presence of various metal ions ( $6 \times 10^{-4}$  M) in THF/ $\text{H}_2\text{O}$  (2/98, v/v) solution. (A-R) **DTPAS**+ $\text{Hg}^{2+}$ + $\text{Ag}^+$ ,  $\text{Al}^{3+}$ ,  $\text{Fe}^{3+}$ ,  $\text{Cu}^{2+}$ ,  $\text{Pb}^{2+}$ ,  $\text{Co}^{2+}$ ,  $\text{Cr}^{3+}$ ,  $\text{Cd}^{2+}$ ,  $\text{Mg}^{2+}$ ,  $\text{Mn}^{2+}$ ,  $\text{Ba}^{2+}$ ,  $\text{Fe}^{2+}$ ,  $\text{Ca}^{2+}$ ,  $\text{Ni}^{2+}$ ,  $\text{Zn}^{2+}$ ,  $\text{Li}^+$ ,  $\text{K}^+$ ,  $\text{Na}^+$ .

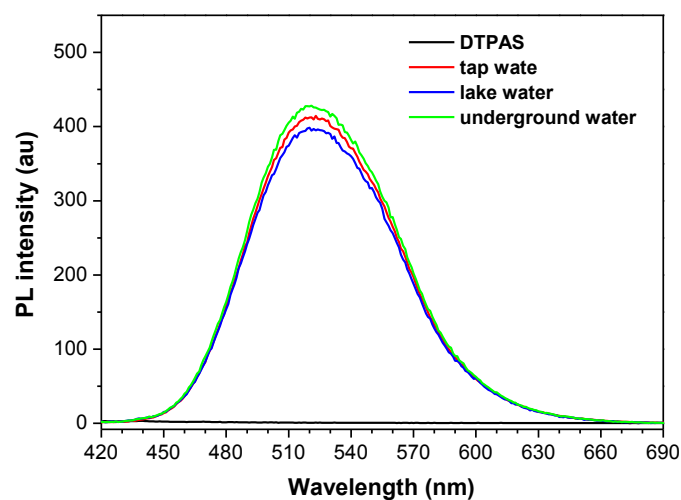

**Fig. S19** PL spectra of **DTPAS** ( $10\ \mu\text{M}$ ) and **DTPAS** reacted with  $\text{Hg}^{2+}$  ( $3 \times 10^{-4}\ \text{M}$ ) in tap water, lake water and underground water in THF/ $\text{H}_2\text{O}$  with  $f_W = 98\%$ .

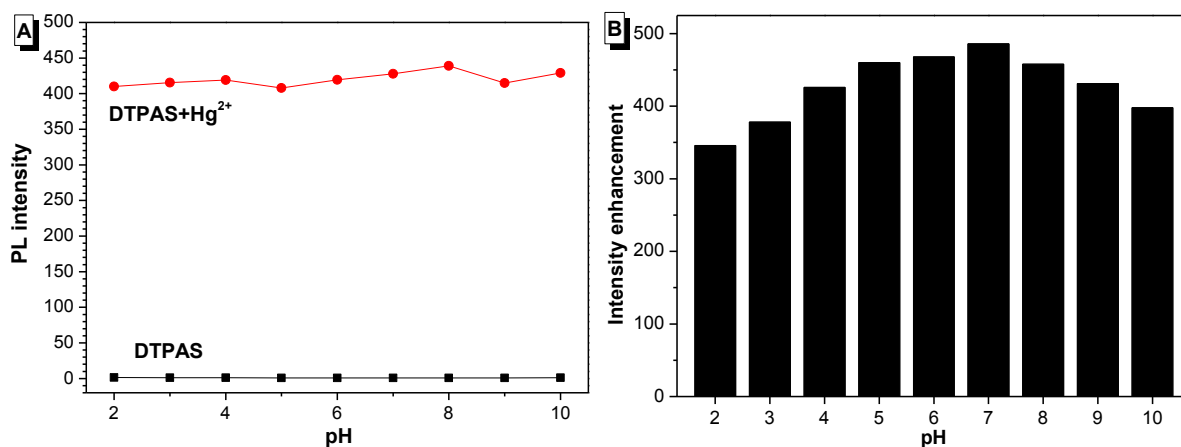

**Fig. S20** (a) PL intensity of **DTPAS** and **DTPAS+Hg<sup>2+</sup>** at different pH values with  $f_W = 98\%$ . (b) PL intensity enhancement of **DTPAS** ( $20\ \mu\text{M}$ ) in the presence of  $\text{Hg}^{2+}$  ( $6 \times 10^{-4}\ \text{M}$ ) at different pH values.



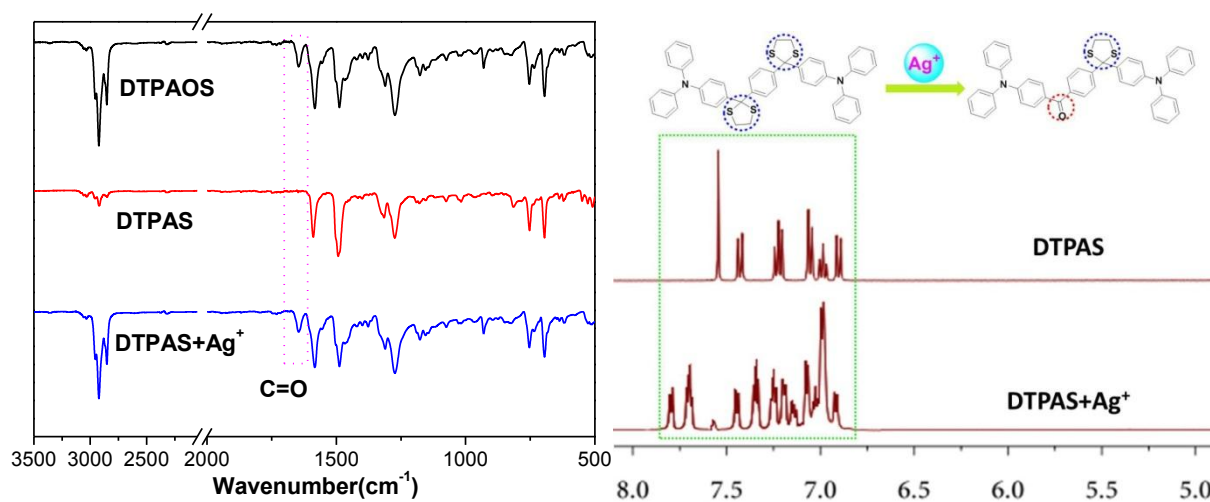

**Fig. S21** IR spectra of **DTPAOS**, **DTPAS** and the reaction product of **DTPAS**+ $\text{Ag}^+$  (left).  $^1\text{H}$  NMR spectra of **DTPAS** (THF-*d*8) before and after the addition of  $\text{Ag}^+$  ions (right).

(a)

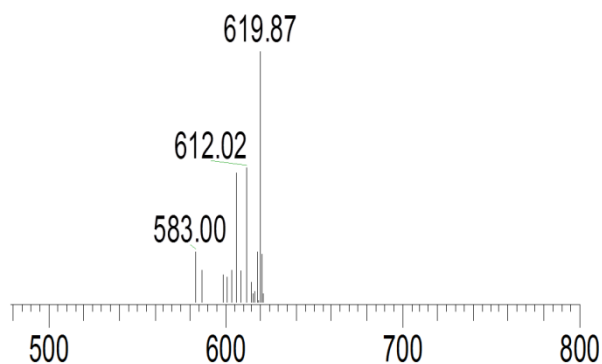

(b)

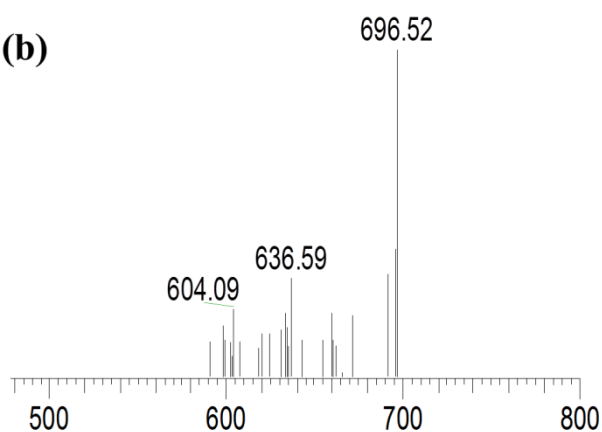

**Fig. S22** MS spectra of the reaction products of **DTPAS** with  $\text{Hg}^{2+}$  (a) and  $\text{Ag}^+$  (b), the values are almost the same as the formula mass of **DTPAO** and **DTPAOS**, respectively.

**Table S3 DTPAS detect  $\text{Hg}^{2+}$  and  $\text{Ag}^+$  in different actual water samples.**

| Water samples     | Metal ions       | Added ( $10^{-5}$ mol/L) | ICP-MS ( $10^{-5}$ mol/L) | Detected ( $10^{-5}$ mol/L) | Recovery (%) | RSD (%) (n=3) |
|-------------------|------------------|--------------------------|---------------------------|-----------------------------|--------------|---------------|
| Tap water         | $\text{Hg}^{2+}$ | 3.0                      | 2.95                      | 2.91                        | 97           | 0.67          |
|                   | $\text{Ag}^+$    | 9.0                      | 8.94                      | 8.92                        | 99           | 1.13          |
| Lake water        | $\text{Hg}^{2+}$ | 3.0                      | 3.04                      | 3.05                        | 101          | 1.06          |
|                   | $\text{Ag}^+$    | 9.0                      | 9.08                      | 8.87                        | 98           | 1.64          |
| Underground water | $\text{Hg}^{2+}$ | 3.0                      | 2.98                      | 3.13                        | 104          | 0.89          |
|                   | $\text{Ag}^+$    | 9.0                      | 9.11                      | 9.21                        | 102          | 1.24          |

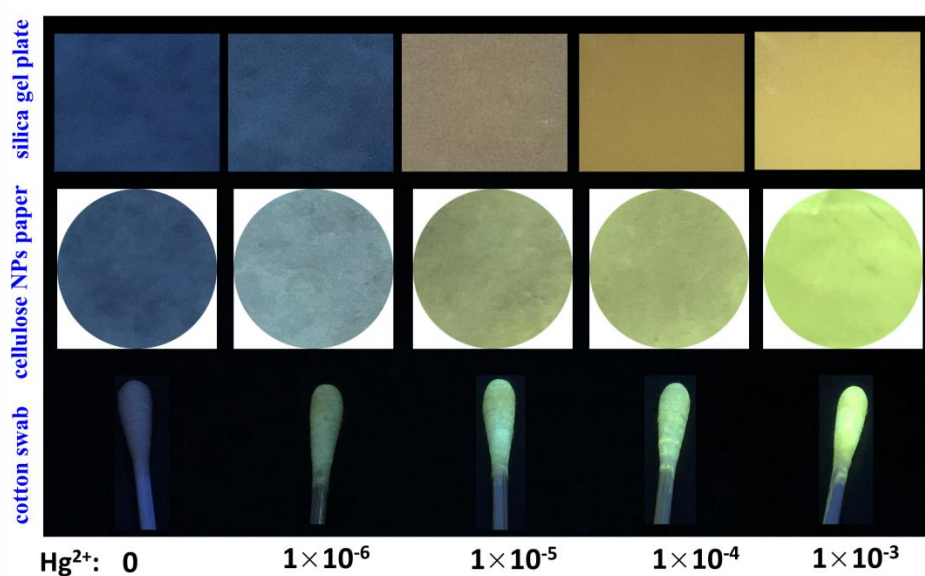**Fig. S23** Fluorescence responses of **DTPAS** encountered various  $\text{Hg}^{2+}$  contents in water with different solid mediums (silica gel plate, cellulose NPs paper and cotton swab).



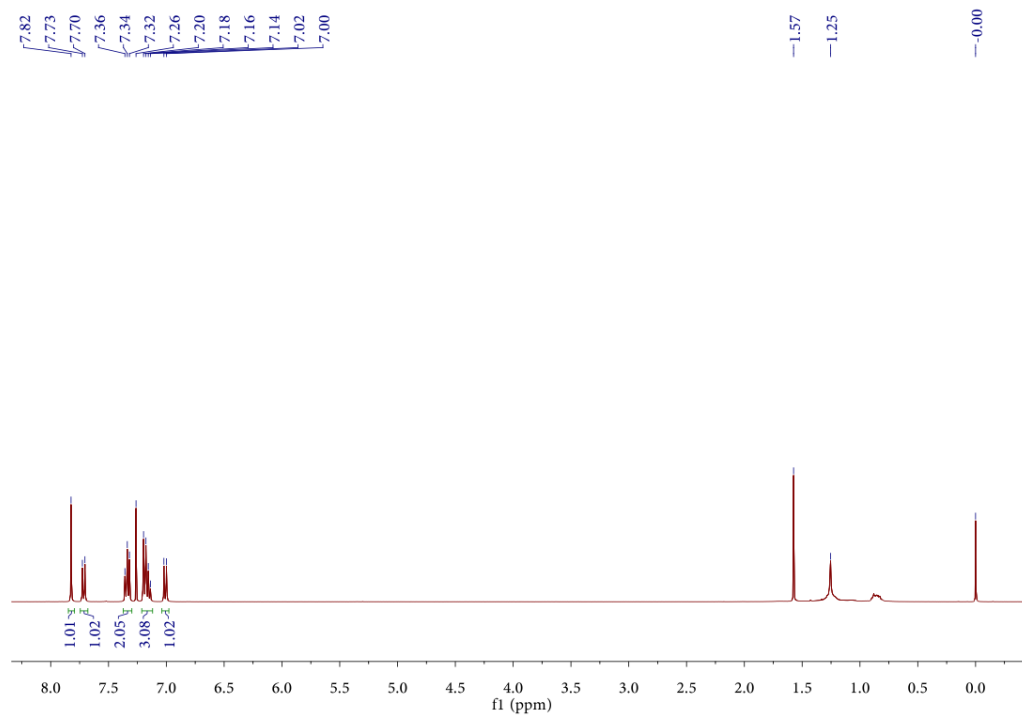

**Fig. S24** <sup>1</sup>H NMR of DTPAO in CDCl<sub>3</sub>.

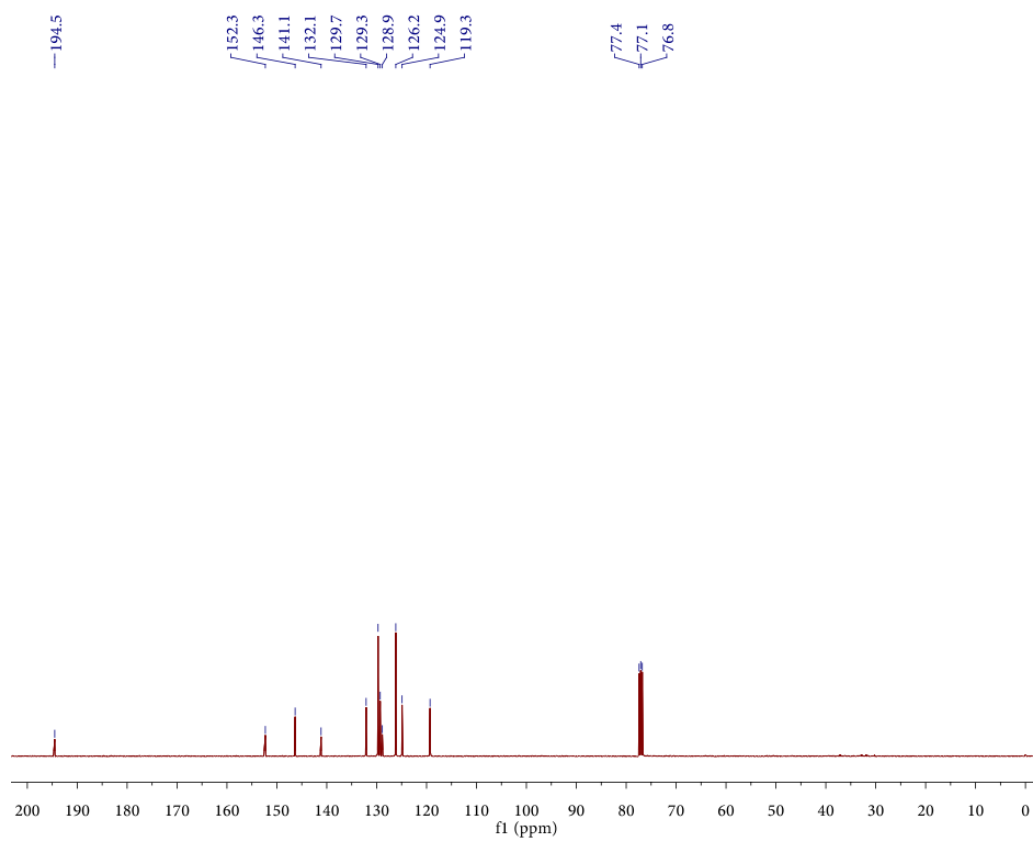

**Fig. S25** <sup>13</sup>C NMR of DTPAO in CDCl<sub>3</sub>.

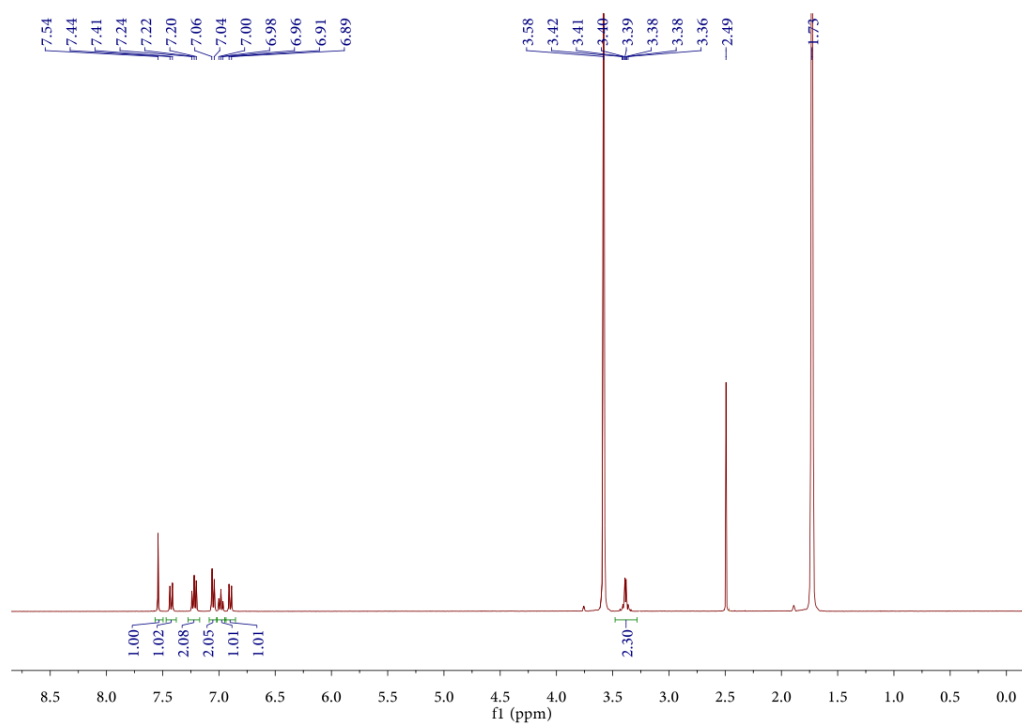

**Fig. S26** <sup>1</sup>H NMR of DTPAS in THF-*d*<sub>8</sub>.

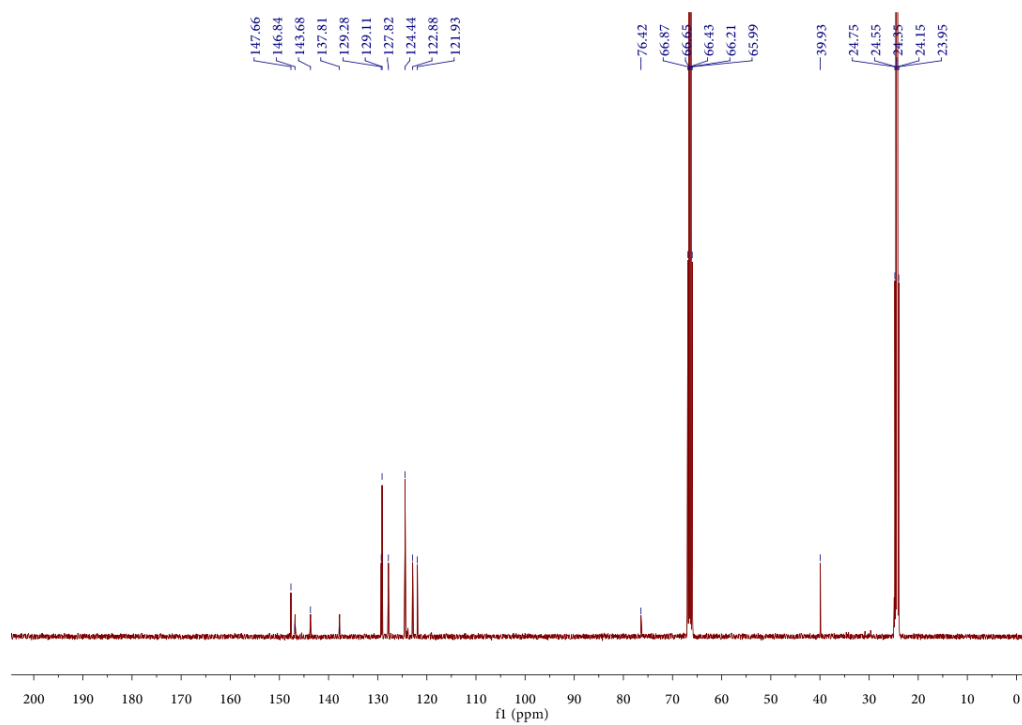

**Fig. S27** <sup>13</sup>C NMR of DTPAS in THF-*d*<sub>8</sub>.

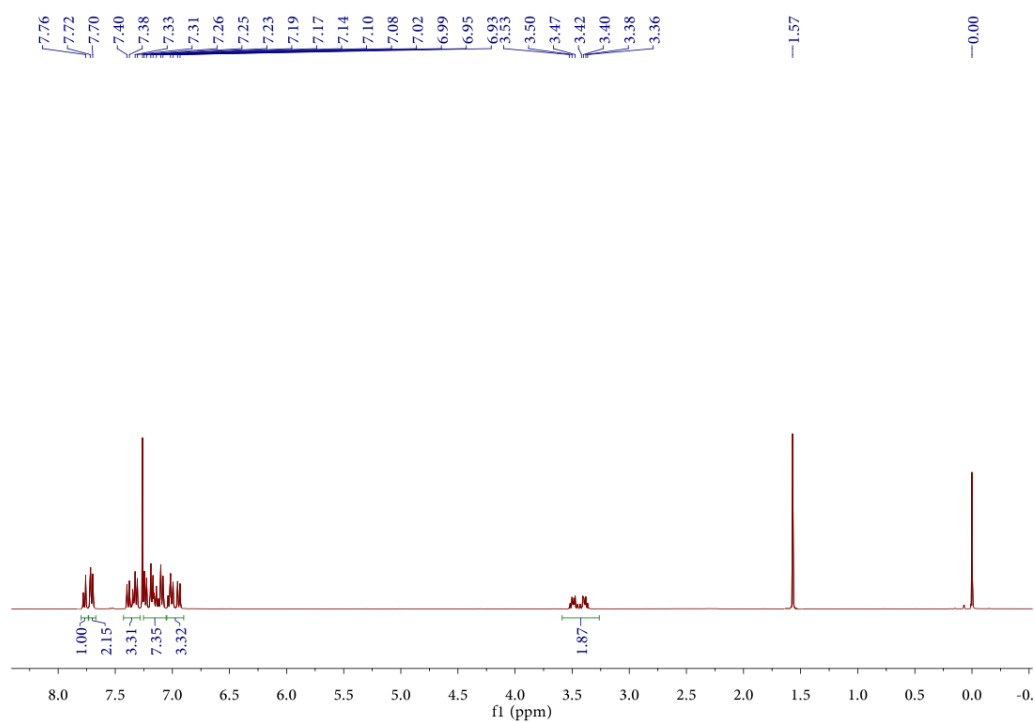

**Fig. S28** <sup>1</sup>H NMR of DTPAOS in CDCl<sub>3</sub>.

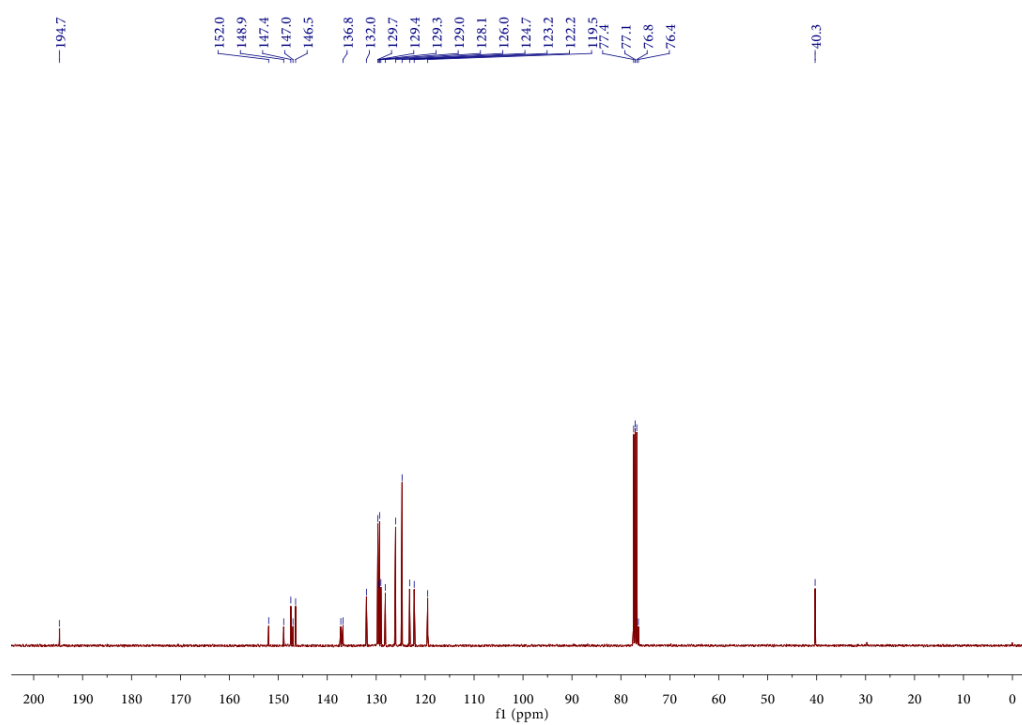

**Fig. S29** <sup>13</sup>C NMR of DTPAOS in CDCl<sub>3</sub>.
